# Supplementary material for: Virulence genes and antimicrobial resistance in Enterococcus strains isolated from dogs and cats in Northeast China
Source: PubMed Central journal article supplement — J Vet Med Sci. 2023 Feb 2;85(3):371–8. doi: 10.1292/jvms.22-0410 (PMC10076200; doi:10.1292/jvms.22-0410), 2023-02-02
Supplement: jvms-85-371-s001.pdf [file jvms-85-371-s001.pdf]

**Supplementary Table 1** Sample Information Summary

Abbreviations: No.= No. of antibiotics resisted HLGR- high-level gentamicin resistance enterococci, VRE- vancomycin resistant enterococci, AMK- Amikacin, AMP-Ampicillin, CIP-Ciprofloxacin, ERY-Erythromycin, GEN-Gentamicin, LZD-Linezolid, MUP-Mupirocin, NIT-Nitrofurantoin, Q-D-Quinupristin-dalfopristin, RIF-Rifampin, TEC-Teicoplanin, TET-Tetracyclin, VAN-Vancomycin

| Name   | Source     | Species              | No. | HLGR | VRE | Antibiotic resistance pattern           | Virulence pattern          |
|--------|------------|----------------------|-----|------|-----|-----------------------------------------|----------------------------|
| PD1CQ  | police dog | <i>E. faecium</i>    | 9   |      |     | GEN/AMK/AMP/ERY/Q-D/LZD/NIT/CIP/RIF/TET | <i>efaAfm</i>              |
| PD2CQ  | police dog | <i>E. faecium</i>    | 1   |      |     | TET                                     | <i>efaAfm</i>              |
| PD3CQ  | police dog | <i>E. faecium</i>    | 2   |      |     | ERY/TET                                 | <i>efaAfm</i>              |
| PD4CQ  | police dog | <i>E. hirae</i>      | 2   |      |     | NIT/TET                                 |                            |
| PD5CQ  | police dog | <i>E. faecalis</i>   | 3   |      |     | AMK/Q-D/RIF                             | <i>gelE-efaAfs-hyl-ace</i> |
| PD6CQ  | police dog | <i>E. hirae</i>      | 3   |      |     | ERY/NIT/TET                             |                            |
| PD8CQ  | police dog | <i>E. faecium</i>    | 8   | √    |     | GEN/AMK/AMP/ERY/Q-D/NIT/CIP/RIF/TET     | <i>efaAfm</i>              |
| PD9CQ  | police dog | <i>E. faecium</i>    | 2   |      |     | NIT/TET                                 | <i>efaAfm</i>              |
| PD10CQ | police dog | <i>E. faecalis</i>   | 3   |      |     | AMK/Q-D/TET                             | <i>gelE-efaAfs-ace</i>     |
| PD11CQ | police dog | <i>E. faecium</i>    | 3   |      |     | ERY/NIT/TET                             | <i>efaAfm</i>              |
| PD12CQ | police dog | <i>E. faecalis</i>   | 3   |      |     | AMK/MUP/RIF                             | <i>efaAfs-ace</i>          |
| PD13CQ | police dog | <i>E. faecium</i>    | 8   | √    |     | GEN/AMK/AMP/ERY/Q-D/NIT/CIP/RIF/TET     | <i>efaAfm</i>              |
| PD14CQ | police dog | <i>E. faecium</i>    | 5   | √    |     | GEN/AMK/AMP/ERY/Q-D/TET                 | <i>efaAfm</i>              |
| PD15CQ | police dog | <i>E. faecium</i>    | 5   | √    |     | GEN/AMK/ERY/Q-D/RIF/TET                 | <i>efaAfm</i>              |
| PD18CQ | police dog | <i>E. faecium</i>    | 3   |      |     | NIT/CIP/TET                             | <i>efaAfm</i>              |
| PD19CQ | police dog | <i>E. faecium</i>    | 2   |      |     | ERY/TET                                 | <i>efaAfm</i>              |
| PD20CQ | police dog | <i>E. faecium</i>    | 2   |      |     | ERY/TET                                 | <i>efaAfm</i>              |
| PD21CQ | police dog | <i>E. faecalis</i>   | 8   | √    |     | GEN/AMK/ERY/Q-D/LZD/MUP/CIP/RIF/TET     | <i>gelE-ace</i>            |
| PD22CQ | police dog | <i>E. faecium</i>    | 2   |      |     | ERY/TET                                 | <i>efaAfm</i>              |
| PD23CQ | police dog | <i>E. gallinarum</i> | 4   |      |     | TEC/LZD/MUP/NIT                         | <i>esp</i>                 |
| PD24CQ | police dog | <i>E. hirae</i>      | 1   |      |     | NIT                                     |                            |
| PD25CQ | police dog | <i>E. faecalis</i>   | 4   |      |     | ERY/Q-D/NIT/TET                         | <i>efaAfm</i>              |

|        |            |                      |   |   |                                         |                                 |
|--------|------------|----------------------|---|---|-----------------------------------------|---------------------------------|
| PD28CQ | police dog | <i>E. faecalis</i>   | 4 |   | ERY/CIP/RIF/TET                         | <i>efaAfm</i>                   |
| PD29CQ | police dog | <i>E. faecium</i>    | 1 |   | TET                                     | <i>efaAfm</i>                   |
| PD30CQ | police dog | <i>E. faecium</i>    | 2 |   | ERY/TET                                 | <i>efaAfm</i>                   |
| PD31CQ | police dog | <i>E. faecalis</i>   | 7 | √ | GEN/AMK/ERY/Q-D/LZD/MUP/CIP/RIF         | <i>asa1-efaAfs-ace</i>          |
| PD32CQ | police dog | <i>E. faecium</i>    | 2 |   | ERY/TET                                 | <i>efaAfm</i>                   |
| PD33CQ | police dog | <i>E. faecalis</i>   | 6 | √ | GEN/AMK/ERY/Q-D/CIP/RIF/TET             | <i>asa1-efaAfs-ace</i>          |
| PD34CQ | police dog | <i>E. hirae</i>      | 1 |   | TET                                     | <i>efaAfs-hyl</i>               |
| PD35CQ | police dog | <i>E. faecalis</i>   | 4 |   | AMK/Q-D/CIP/RIF                         | <i>cylA-esp-asa1-efaAfs-ace</i> |
| PD36CQ | police dog | <i>E. hirae</i>      | 1 |   | TET                                     |                                 |
| PD37CQ | police dog | <i>E. faecium</i>    | 3 |   | ERY/Q-D/TET                             | <i>efaAfm</i>                   |
| PD38CQ | police dog | <i>E. hirae</i>      | 2 |   | NIT/TET                                 |                                 |
| PD39CQ | police dog | <i>E. faecium</i>    | 4 | √ | GEN/ERY/NIT/TET                         | <i>efaAfm</i>                   |
| PD40CQ | police dog | <i>E. hirae</i>      | 1 |   | TET                                     |                                 |
| PD41CQ | police dog | <i>E. faecium</i>    | 2 |   | ERY/TET                                 |                                 |
| PD43CQ | police dog | <i>E. hirae</i>      | 1 |   | TET                                     |                                 |
| PD45CQ | police dog | <i>E. faecium</i>    | 7 | √ | GEN/AMK/ERY/Q-D/LZD/NIT/CIP/TET         | <i>efaAfm</i>                   |
| PD46CQ | police dog | <i>E. faecium</i>    | 3 |   | ERY/Q-D/TET                             | <i>efaAfm</i>                   |
| PD47CQ | police dog | <i>E. faecium</i>    | 3 |   | ERY/RIF/TET                             |                                 |
| PD49CQ | police dog | <i>E. faecalis</i>   | 7 |   | AMK/ERY/Q-D/LZD/CIP/RIF/TET             | <i>gelE-efaAfs-hyl-ace</i>      |
| PD50CQ | police dog | <i>E. faecium</i>    | 9 | √ | GEN/AMK/AMP/ERY/Q-D/LZD/NIT/CIP/RIF/TET | <i>efaAfm</i>                   |
| PD51CQ | police dog | <i>E. faecium</i>    | 2 |   | ERY/TET                                 | <i>efaAfm</i>                   |
| PD52CQ | police dog | <i>E. faecium</i>    | 2 |   | NIT/TET                                 | <i>efaAfm</i>                   |
| PD53CQ | police dog | <i>E. faecium</i>    | 2 |   | RIF/TET                                 | <i>efaAfm</i>                   |
| PD54CQ | police dog | <i>E. gallinarum</i> | 1 |   | LZD                                     |                                 |
| PD55CQ | police dog | <i>E. hirae</i>      | 1 |   | TET                                     |                                 |
| PD56CQ | police dog | <i>E. faecium</i>    | 3 |   | ERY/NIT/TET                             | <i>efaAfm</i>                   |
| PD57CQ | police dog | <i>E. faecium</i>    | 4 |   | ERY/Q-D/NIT/TET                         | <i>efaAfm</i>                   |
| PD58CQ | police dog | <i>E. hirae</i>      | 2 |   | ERY/TET                                 | <i>efaAfm</i>                   |
| PD59CQ | police dog | <i>E. hirae</i>      | 3 |   | ERY/NIT/TET                             |                                 |

|         |            |                    |   |   |                                     |                            |
|---------|------------|--------------------|---|---|-------------------------------------|----------------------------|
| PD60CQ  | police dog | <i>E. faecium</i>  | 2 |   | RIF/TET                             | <i>efaAfm</i>              |
| PD61CQ  | police dog | <i>E. faecium</i>  | 2 |   | ERY/TET                             | <i>efaAfm</i>              |
| PD62CQ  | police dog | <i>E. faecium</i>  | 2 |   | ERY/TET                             | <i>efaAfm</i>              |
| PD63CQ  | police dog | <i>E. faecium</i>  | 7 | √ | GEN/AMK/AMP/ERY/Q-D/CIP/RIF/TET     | <i>efaAfm</i>              |
| PD65CQ  | police dog | <i>E. hirae</i>    | 3 |   | ERY/NIT/TET                         |                            |
| PD66CQ  | police dog | <i>E. faecium</i>  | 2 |   | ERY/TET                             | <i>efaAfm</i>              |
| PD67CQ  | police dog | <i>E. faecium</i>  | 1 |   | TET                                 | <i>efaAfm</i>              |
| PD68CQ  | police dog | <i>E. faecalis</i> | 3 |   | AMK/Q-D/RIF                         | <i>gelE-efaAfs-hyl-ace</i> |
| PD70CQ  | police dog | <i>E. faecium</i>  | 2 |   | RIF/TET                             | <i>efaAfm</i>              |
| PD71CQ  | police dog | <i>E. faecium</i>  | 4 | √ | GEN/AMK/ERY/NIT/TET                 | <i>efaAfm</i>              |
| PD72CQ  | police dog | <i>E. hirae</i>    | 3 |   | ERY/NIT/TET                         |                            |
| PD74CQ  | police dog | <i>E. hirae</i>    | 2 |   | NIT/TET                             |                            |
| PD77CQ  | police dog | <i>E. faecalis</i> | 3 |   | AMK/Q-D/RIF                         | <i>gelE-efaAfs-hyl-ace</i> |
| PD79CQ  | police dog | <i>E. faecium</i>  | 2 |   | ERY/TET                             | <i>efaAfm</i>              |
| PD81CQ  | police dog | <i>E. faecium</i>  | 1 |   | TET                                 | <i>efaAfm</i>              |
| PD82CQ  | police dog | <i>E. faecium</i>  | 6 | √ | GEN/AMK/AMP/ERY/CIP/RIF/TET         | <i>efaAfm</i>              |
| PD84CQ  | police dog | <i>E. faecium</i>  | 1 |   | TET                                 | <i>efaAfm</i>              |
| PD85CQ  | police dog | <i>E. faecium</i>  | 4 |   | NIT/CIP/RIF/TET                     | <i>efaAfm</i>              |
| PD87CQ  | police dog | <i>E. hirae</i>    | 1 |   | NIT                                 |                            |
| PD90CQ  | police dog | <i>E. faecium</i>  | 1 |   | NIT                                 | <i>efaAfm</i>              |
| PD91CQ  | police dog | <i>E. hirae</i>    | 4 |   | NIT/CIP/RIF/TET                     |                            |
| PD92CQ  | police dog | <i>E. faecium</i>  | 3 |   | CIP/RIF/TET                         | <i>efaAfm</i>              |
| PD93CQ  | police dog | <i>E. faecium</i>  | 2 |   | ERY/TET                             | <i>efaAfm</i>              |
| PD95CQ  | police dog | <i>E. hirae</i>    | 2 |   | NIT/TET                             |                            |
| PD96CQ  | police dog | <i>E. faecium</i>  | 3 |   | ERY/Q-D/TET                         | <i>efaAfm</i>              |
| PD97CQ  | police dog | <i>E. faecium</i>  | 1 |   | TET                                 | <i>efaAfm</i>              |
| PD98CQ  | police dog | <i>E. faecium</i>  | 3 |   | NIT/RIF/TET                         | <i>efaAfm</i>              |
| PD99CQ  | police dog | <i>E. faecium</i>  | 3 |   | AMK/NIT/TET                         | <i>efaAfm</i>              |
| PD101CQ | police dog | <i>E. faecium</i>  | 8 | √ | GEN/AMK/AMP/ERY/Q-D/NIT/CIP/RIF/TET | <i>efaAfm</i>              |

|         |            |                      |   |   |                                 |                                 |
|---------|------------|----------------------|---|---|---------------------------------|---------------------------------|
| PD102CQ | police dog | <i>E. faecium</i>    | 5 | √ | GEN/AMK/AMP/ERY/NIT/TET         | <i>efaAfm</i>                   |
| PD103CQ | police dog | <i>E. hirae</i>      | 1 |   | TET                             |                                 |
| PD104CQ | police dog | <i>E. faecium</i>    | 2 |   | ERY/TET                         | <i>efaAfm</i>                   |
| PD105CQ | police dog | <i>E. faecium</i>    | 1 |   | TET                             | <i>efaAfm</i>                   |
| PD106CQ | police dog | <i>E. gallinarum</i> | 6 |   | ERY/LZD/MUP/CIP/RIF/TET         |                                 |
| PD107CQ | police dog | <i>E. faecalis</i>   | 7 | √ | GEN/AMK/ERY/Q-D/LZD/CIP/RIF/TET | <i>cylA-esp-asaI-efaAfs-ace</i> |
| PD108CQ | police dog | <i>E. faecium</i>    | 2 |   | AMK/TET                         |                                 |
| PD109CQ | police dog | <i>E. faecium</i>    | 2 |   | ERY/TET                         | <i>efaAfm</i>                   |
| PD110CQ | police dog | <i>E. faecium</i>    | 4 |   | AMP/ERY/Q-D/TET                 | <i>efaAfm</i>                   |
| PD111CQ | police dog | <i>E. faecalis</i>   | 4 |   | AMK/Q-D/CIP/TET                 | <i>gelE-efaAfs-hyl-ace</i>      |
| PD112CQ | police dog | <i>E. faecium</i>    | 2 |   | NIT/TET                         | <i>efaAfm</i>                   |
| PD115CQ | police dog | <i>E. faecium</i>    | 3 |   | AMK/ERY/TET                     | <i>efaAfm</i>                   |
| PD116CQ | police dog | <i>E. hirae</i>      | 1 |   | TET                             |                                 |
| PD117CQ | police dog | <i>E. hirae</i>      | 3 |   | NIT/RIF/TET                     |                                 |
| PD118CQ | police dog | <i>E. hirae</i>      | 2 |   | ERY/TET                         |                                 |
| PD119CQ | police dog | <i>E. faecium</i>    | 2 |   | AMK/TET                         |                                 |
| PD121CQ | police dog | <i>E. hirae</i>      | 1 |   | TET                             |                                 |
| PD122CQ | police dog | <i>E. faecium</i>    | 2 |   | NIT/TET                         | <i>efaAfm</i>                   |
| PD124CQ | police dog | <i>E. faecalis</i>   | 6 | √ | GEN/AMK/ERY/Q-D/CIP/RIF/TET     | <i>gelE-efaAfs-hyl-ace</i>      |
| PD126CQ | police dog | <i>E. faecium</i>    | 1 |   | TET                             | <i>efaAfm</i>                   |
| PD128CQ | police dog | <i>E. faecium</i>    | 4 |   | AMK/ERY/Q-D/TET                 | <i>efaAfm</i>                   |
| PD129CQ | police dog | <i>E. hirae</i>      | 1 |   | TET                             |                                 |
| PD131CQ | police dog | <i>E. hirae</i>      | 1 |   | TET                             |                                 |
| PD132CQ | police dog | <i>E. faecium</i>    | 3 |   | ERY/NIT/TET                     | <i>efaAfm</i>                   |
| PD133CQ | police dog | <i>E. faecalis</i>   | 1 |   | TET                             | <i>efaAfm</i>                   |
| PD134CQ | police dog | <i>E. faecium</i>    | 2 |   | RIF/TET                         | <i>efaAfm</i>                   |
| PD135CQ | police dog | <i>E. faecium</i>    | 4 |   | ERY/NIT/CIP/TET                 | <i>efaAfm</i>                   |
| PD137CQ | police dog | <i>E. faecalis</i>   | 3 |   | ERY/NIT/TET                     | <i>efaAfm</i>                   |
| PD138CQ | police dog | <i>E. hirae</i>      | 2 |   | Q-D/TET                         |                                 |

|         |            |                      |   |   |                                     |                                 |
|---------|------------|----------------------|---|---|-------------------------------------|---------------------------------|
| PD139CQ | police dog | <i>E. faecium</i>    | 2 |   | CIP/TET                             | <i>efaAfm</i>                   |
| PD140CQ | police dog | <i>E. faecium</i>    | 6 | √ | GEN/AMK/AMP/ERY/CIP/RIF/TET         | <i>efaAfm</i>                   |
| PD141CQ | police dog | <i>E. hirae</i>      | 2 |   | ERY/TET                             |                                 |
| PD142CQ | police dog | <i>E. hirae</i>      | 3 |   | ERY/NIT/TET                         | <i>efaAfm</i>                   |
| PD143CQ | police dog | <i>E. gallinarum</i> | 5 |   | ERY/LZD/MUP/CIP/TET                 | <i>esp</i>                      |
| PD144CQ | police dog | <i>E. faecium</i>    | 3 |   | ERY/NIT/TET                         | <i>efaAfm</i>                   |
| PD145CQ | police dog | <i>E. faecalis</i>   | 4 |   | AMK/Q-D/RIF/TET                     | <i>gelE-efaAfs-hyl-ace</i>      |
| PD146CQ | police dog | <i>E. faecium</i>    | 2 |   | ERY/TET                             | <i>efaAfm</i>                   |
| PD147CQ | police dog | <i>E. faecium</i>    | 2 |   | ERY/TET                             | <i>efaAfm</i>                   |
| PD148CQ | police dog | <i>E. hirae</i>      | 1 |   | TET                                 |                                 |
| PD149CQ | police dog | <i>E. hirae</i>      | 1 |   | TET                                 |                                 |
| PD150CQ | police dog | <i>E. faecalis</i>   | 4 | √ | GEN/AMK/Q-D/RIF/TET                 | <i>gelE-efaAfs-hyl-ace</i>      |
| PD151CQ | police dog | <i>E. faecalis</i>   | 4 |   | AMK/Q-D/CIP/RIF                     | <i>gelE-efaAfs-hyl-ace</i>      |
| PD152CQ | police dog | <i>E. hirae</i>      | 2 |   | ERY/TET                             |                                 |
| PD153CQ | police dog | <i>E. faecalis</i>   | 5 | √ | GEN/AMK/ERY/Q-D/RIF/TET             | <i>asa1-gelE-efaAfs-ace</i>     |
| PD154CQ | police dog | <i>E. faecium</i>    | 3 |   | CIP/RIF/TET                         | <i>efaAfm</i>                   |
| PD155CQ | police dog | <i>E. faecium</i>    | 2 |   | AMK/TET                             |                                 |
| PD156CQ | police dog | <i>E. faecalis</i>   | 3 |   | AMK/Q-D/TET                         | <i>efaAfs-ace</i>               |
| PD157CQ | police dog | <i>E. hirae</i>      | 1 |   | TET                                 |                                 |
| PD158CQ | police dog | <i>E. faecium</i>    | 6 | √ | GEN/AMK/AMP/ERY/CIP/RIF/TET         | <i>efaAfm</i>                   |
| PD159CQ | police dog | <i>E. faecalis</i>   | 4 |   | AMK/Q-D/RIF/TET                     | <i>gelE-efaAfs-ace</i>          |
| PD160CQ | police dog | <i>E. faecium</i>    | 3 |   | ERY/NIT/TET                         |                                 |
| PD161CQ | police dog | <i>E. faecium</i>    | 6 |   | AMP/ERY/Q-D/NIT/CIP/TET             | <i>efaAfm</i>                   |
| PD162CQ | police dog | <i>E. faecium</i>    | 7 | √ | GEN/AMK/AMP/ERY/Q-D/CIP/RIF/TET     | <i>efaAfm</i>                   |
| PD163CQ | police dog | <i>E. faecium</i>    | 8 | √ | GEN/AMK/AMP/ERY/Q-D/NIT/CIP/RIF/TET | <i>efaAfm</i>                   |
| PD164CQ | police dog | <i>E. faecium</i>    | 3 |   | NIT/CIP/TET                         | <i>efaAfm</i>                   |
| PD165CQ | police dog | <i>E. faecium</i>    | 3 |   | ERY/NIT/TET                         | <i>efaAfm</i>                   |
| HC1-1CQ | pet dog    | <i>E. faecium</i>    | 3 |   | Q-D/NIT/RIF/TET                     | <i>efaAfm</i>                   |
| HC1-3CQ | pet dog    | <i>E. faecalis</i>   | 6 | √ | GEN/AMK/ERY/Q-D/CIP/RIF/TET         | <i>cylA-esp-asa1-efaAfs-ace</i> |

|          |         |                      |   |   |                                     |                                      |
|----------|---------|----------------------|---|---|-------------------------------------|--------------------------------------|
| HC1-5CQ  | pet dog | <i>E. faecalis</i>   | 5 | √ | GEN/AMK/ERY/Q-D/CIP/TET             | <i>cylA-esp-asaI-efaAfs-ace</i>      |
| HC1-6CQ  | pet dog | <i>E. faecium</i>    | 2 |   | ERY/Q-D/RIF                         | <i>efaAfm</i>                        |
| HC1-7CQ  | pet dog | <i>E. faecium</i>    | 6 |   | AMP/ERY/Q-D/NIT/CIP/RIF/TET         | <i>efaAfm</i>                        |
| HC1-8CQ  | pet dog | <i>E. faecalis</i>   | 4 |   | Q-D/NIT/RIF/TET                     | <i>efaAfm</i>                        |
| HC1-9CQ  | pet dog | <i>E. faecium</i>    | 2 |   | Q-D/RIF/TET                         | <i>efaAfm</i>                        |
| HC1-10CQ | pet dog | <i>E. faecalis</i>   | 1 | √ | Q-D                                 |                                      |
| HC1-11CQ | pet dog | <i>E. gallinarum</i> | 2 |   | MUP/RIF                             |                                      |
| HC1-12CQ | pet dog | <i>E. faecalis</i>   | 8 | √ | GEN/AMK/ERY/Q-D/LZD/MUP/CIP/RIF/TET | <i>cylA-esp-asaI-efaAfs-ace</i>      |
| HC1-13CQ | pet dog | <i>E. faecium</i>    | 3 |   | NIT/RIF/TET                         |                                      |
| HC1-14CQ | pet dog | <i>E. faecalis</i>   | 2 |   | AMK/Q-D                             | <i>asaI-gelE-efaAfs-hyl-ace</i>      |
| HC1-15CQ | pet dog | <i>E. faecium</i>    | 3 |   | ERY/Q-D/NIT/RIF                     | <i>efaAfm</i>                        |
| HC1-16CQ | pet dog | <i>E. faecium</i>    | 7 | √ | GEN/AMK/AMP/ERY/Q-D/NIT/CIP/RIF/TET | <i>efaAfm</i>                        |
| HC1-18CQ | pet dog | <i>E. faecium</i>    | 3 |   | Q-D/NIT/RIF/TET                     | <i>efaAfm</i>                        |
| HC1-21CQ | pet dog | <i>E. faecium</i>    | 2 |   | NIT/RIF                             | <i>efaAfm</i>                        |
| HC1-22CQ | pet dog | <i>E. hirae</i>      | 3 | √ | GEN/AMK/ERY/TET                     |                                      |
| HC1-23CQ | pet dog | <i>E. faecalis</i>   | 5 | √ | GEN/AMK/ERY/Q-D/RIF/TET             | <i>esp-asaI-efaAfs-ace</i>           |
| HC1-24CQ | pet dog | <i>E. faecalis</i>   | 6 | √ | GEN/AMK/ERY/Q-D/CIP/RIF/TET         | <i>cylA-esp-asaI-efaAfs-ace</i>      |
| HC1-26CQ | pet dog | <i>E. faecalis</i>   | 5 | √ | GEN/ERY/Q-D/RIF/TET                 | <i>esp-asaI-efaAfs-ace</i>           |
| HC1-27CQ | pet dog | <i>E. faecium</i>    | 4 |   | ERY/Q-D/NIT/CIP/TET                 | <i>efaAfm</i>                        |
| HC1-29CQ | pet dog | <i>E. faecium</i>    | 7 |   | AMK/AMP/ERY/Q-D/NIT/CIP/RIF/TET     | <i>efaAfm</i>                        |
| HC1-31CQ | pet dog | <i>E. faecium</i>    | 1 |   | TET                                 |                                      |
| HC1-32CQ | pet dog | <i>E. faecalis</i>   | 7 | √ | GEN/AMK/ERY/Q-D/LZD/CIP/RIF/TET     | <i>cylA-esp-asaI-gelE-efaAfs-ace</i> |
| HC1-33CQ | pet dog | <i>E. faecalis</i>   | 4 |   | AMK/Q-D/RIF/TET                     | <i>asaI-gelE-efaAfs-hyl-ace</i>      |
| HC1-34CQ | pet dog | <i>E. hirae</i>      | 4 |   | ERY/Q-D/RIF/TET                     |                                      |
| HC1-36CQ | pet dog | <i>E. faecium</i>    | 7 |   | AMK/AMP/ERY/Q-D/NIT/CIP/RIF/TET     | <i>efaAfm</i>                        |
| HC1-37CQ | pet dog | <i>E. faecium</i>    | 1 |   | NIT                                 | <i>efaAfm</i>                        |
| HC1-38CQ | pet dog | <i>E. faecalis</i>   | 5 |   | AMK/ERY/Q-D/RIF/TET                 | <i>esp-asaI-gelE-efaAfs-hyl-ace</i>  |
| HC1-39CQ | pet dog | <i>E. faecalis</i>   | 6 | √ | GEN/AMK/ERY/Q-D/CIP/RIF/TET         | <i>esp-asaI-efaAfs-ace</i>           |
| HC1-40CQ | pet dog | <i>E. faecium</i>    | 1 |   | Q-D/RIF                             |                                      |

|          |         |                    |   |   |                                     |                                 |
|----------|---------|--------------------|---|---|-------------------------------------|---------------------------------|
| HC1-41CQ | pet dog | <i>E. hirae</i>    | 2 |   | NIT/TET                             |                                 |
| HC1-42CQ | pet dog | <i>E. faecium</i>  | 4 |   | AMK/ERY/RIF/TET                     |                                 |
| HC1-43CQ | pet dog | <i>E. faecium</i>  | 2 |   | ERY/RIF                             |                                 |
| HC1-46CQ | pet dog | <i>E. faecalis</i> | 5 |   | ERY/Q-D/LZD/CIP/TET                 | <i>asa1-efaAfs-ace</i>          |
| HC1-47CQ | pet dog | <i>E. hirae</i>    | 2 |   | NIT/TET                             |                                 |
| HC1-48CQ | pet dog | <i>E. faecalis</i> | 6 | √ | GEN/AMK/ERY/Q-D/CIP/RIF/TET         | <i>asa1-efaAfs-ace</i>          |
| HC1-50CQ | pet dog | <i>E. faecalis</i> | 4 | √ | GEN/AMK/ERY/Q-D/TET                 | <i>asa1-gelE-efaAfs-hyl-ace</i> |
| HC1-51CQ | pet dog | <i>E. faecium</i>  | 7 | √ | GEN/AMK/AMP/ERY/Q-D/NIT/CIP/RIF/TET | <i>efaAfm</i>                   |
| HC1-52CQ | pet dog | <i>E. faecalis</i> | 5 | √ | GEN/AMK/ERY/Q-D/RIF/TET             | <i>esp-asa1-gelE-efaAfs-ace</i> |
| HC1-53CQ | pet dog | <i>E. faecalis</i> | 6 | √ | GEN/AMK/Q-D/MUP/CIP/RIF/TET         | <i>cylA-esp-asa1-efaAfs-ace</i> |
| HC1-54CQ | pet dog | <i>E. faecalis</i> | 3 |   | ERY/Q-D/RIF                         | <i>efaAfm</i>                   |
| HC1-55CQ | pet dog | <i>E. faecium</i>  | 2 |   | CIP/TET                             |                                 |
| HC1-56CQ | pet dog | <i>E. faecium</i>  | 2 |   | ERY/RIF                             | <i>efaAfm</i>                   |
| HC1-57CQ | pet dog | <i>E. faecium</i>  | 1 |   | Q-D/RIF                             | <i>efaAfm</i>                   |
| HC1-61CQ | pet dog | <i>E. faecalis</i> | 5 |   | AMP/ERY/Q-D/RIF/TET                 | <i>efaAfm</i>                   |
| HC2-2CQ  | pet dog | <i>E. faecium</i>  | 3 |   | Q-D/NIT/RIF/TET                     | <i>efaAfm</i>                   |
| HC2-8CQ  | pet dog | <i>E. faecium</i>  | 4 |   | ERY/NIT/RIF/TET                     | <i>efaAfm</i>                   |
| HC2-9CQ  | pet dog | <i>E. faecalis</i> | 5 |   | AMK/Q-D/CIP/RIF/TET                 | <i>gelE-efaAfs-hyl-ace</i>      |
| HC2-14CQ | pet dog | <i>E. faecium</i>  | 2 |   | ERY/RIF                             | <i>efaAfm</i>                   |
| HC2-15CQ | pet dog | <i>E. faecalis</i> | 8 | √ | GEN/AMK/AMP/ERY/Q-D/NIT/CIP/RIF/TET | <i>efaAfm</i>                   |
| HC2-16CQ | pet dog | <i>E. faecium</i>  | 2 |   | ERY/Q-D/RIF                         | <i>efaAfm</i>                   |
| HC2-18CQ | pet dog | <i>E. faecium</i>  | 3 |   | ERY/NIT/RIF                         | <i>efaAfm</i>                   |
| HC2-22CQ | pet dog | <i>E. faecalis</i> | 4 |   | AMK/CIP/RIF/TET                     | <i>gelE-efaAfs-hyl-ace</i>      |
| HC2-25CQ | pet dog | <i>E. faecium</i>  | 4 |   | ERY/NIT/RIF/TET                     | <i>efaAfm</i>                   |
| HC2-28CQ | pet dog | <i>E. faecalis</i> | 7 | √ | GEN/AMK/AMP/ERY/Q-D/NIT/CIP/TET     | <i>efaAfm</i>                   |
| HC2-29CQ | pet dog | <i>E. faecium</i>  | 3 |   | ERY/NIT/RIF                         | <i>efaAfm</i>                   |
| HC2-31CQ | pet dog | <i>E. hirae</i>    | 1 |   | TET                                 |                                 |
| HC2-32CQ | pet dog | <i>E. faecalis</i> | 5 |   | AMK/ERY/Q-D/RIF/TET                 | <i>cylA-esp-asa1-efaAfs-ace</i> |
| HC2-33CQ | pet dog | <i>E. hirae</i>    | 5 |   | ERY/LZD/NIT/CIP/TET                 |                                 |

|          |         |                    |   |   |                                     |                                          |
|----------|---------|--------------------|---|---|-------------------------------------|------------------------------------------|
| HC2-34CQ | pet dog | <i>E. hirae</i>    | 9 |   | AMK/TEC/ERY/Q-D/LZD/MUP/NIT/CIP/TET |                                          |
| HC2-39CQ | pet dog | <i>E. faecium</i>  | 4 |   | AMK/Q-D/CIP/RIF/TET                 | <i>efaAfm</i>                            |
| HC2-40CQ | pet dog | <i>E. faecalis</i> | 4 | √ | GEN/AMK/ERY/Q-D/RIF                 | <i>asa1-gelE-efaAfs-hyl-ace</i>          |
| HC2-44CQ | pet dog | <i>E. faecalis</i> | 4 |   | AMK/Q-D/RIF/TET                     | <i>esp-asa1-efaAfs-ace</i>               |
| HC2-48CQ | pet dog | <i>E. faecium</i>  | 3 |   | ERY/Q-D/NIT/RIF                     | <i>efaAfm</i>                            |
| HC2-50CQ | pet dog | <i>E. faecium</i>  | 4 |   | ERY/NIT/RIF/TET                     | <i>efaAfm</i>                            |
| HC2-51CQ | pet dog | <i>E. faecalis</i> | 6 |   | AMK/ERY/Q-D/LZD/RIF/TET             | <i>asa1-gelE-efaAfs-hyl-ace</i>          |
| HC2-52CQ | pet dog | <i>E. faecalis</i> | 5 |   | AMK/ERY/Q-D/NIT/TET                 | <i>efaAfm</i>                            |
| HC2-55CQ | pet dog | <i>E. faecium</i>  | 3 |   | ERY/Q-D/NIT/TET                     | <i>efaAfm</i>                            |
| HC2-56CQ | pet dog | <i>E. faecalis</i> | 1 |   | NIT                                 | <i>efaAfm</i>                            |
| HC2-57CQ | pet dog | <i>E. faecium</i>  | 3 |   | ERY/RIF/TET                         | <i>efaAfm</i>                            |
| HC2-58CQ | pet dog | <i>E. faecium</i>  | 1 |   | RIF                                 | <i>efaAfm</i>                            |
| HC2-59CQ | pet dog | <i>E. faecalis</i> | 3 |   | AMK/Q-D/RIF                         | <i>cylA-esp-asa1-gelE-efaAfs-hyl-ace</i> |
| HC2-65CQ | pet dog | <i>E. hirae</i>    | 3 |   | Q-D/NIT/TET                         |                                          |
| HC3-2CQ  | pet dog | <i>E. faecalis</i> | 6 |   | AMK/ERY/Q-D/MUP/RIF/TET             | <i>efaAfs-ace</i>                        |
| HC3-4CQ  | pet dog | <i>E. faecium</i>  | 6 |   | AMK/ERY/Q-D/NIT/CIP/RIF/TET         | <i>efaAfm</i>                            |
| HC3-6CQ  | pet dog | <i>E. faecalis</i> | 4 | √ | GEN/AMK/ERY/Q-D/TET                 | <i>asa1-gelE-efaAfs-hyl-ace</i>          |
| HC3-10CQ | pet dog | <i>E. faecalis</i> | 7 | √ | GEN/AMK/ERY/Q-D/LZD/CIP/RIF/TET     | <i>esp-efaAfs-ace</i>                    |
| HC4-2CQ  | pet dog | <i>E. faecium</i>  | 3 |   | NIT/CIP/RIF                         | <i>efaAfm</i>                            |
| HC4-3CQ  | pet dog | <i>E. hirae</i>    | 7 |   | AMK/ERY/Q-D/LZD/NIT/RIF/TET         |                                          |
| HC4-6CQ  | pet dog | <i>E. faecium</i>  | 2 |   | Q-D/NIT/TET                         | <i>efaAfm</i>                            |
| HC4-7CQ  | pet dog | <i>E. faecalis</i> | 4 |   | AMK/Q-D/RIF/TET                     | <i>esp-gelE-efaAfs-ace</i>               |
| HC4-8CQ  | pet dog | <i>E. hirae</i>    | 4 |   | VAN/Q-D/NIT/TET                     |                                          |
| HC4-9CQ  | pet dog | <i>E. faecalis</i> | 5 | √ | GEN/AMK/ERY/Q-D/RIF/TET             | <i>cylA-esp-asa1-efaAfs-ace</i>          |
| HC4-10CQ | pet dog | <i>E. hirae</i>    | 1 |   | TET                                 |                                          |
| HC4-13CQ | pet dog | <i>E. faecalis</i> | 5 |   | AMK/Q-D/CIP/RIF/TET                 | <i>esp-asa1-gelE-efaAfs-ace</i>          |
| HC4-14CQ | pet dog | <i>E. faecalis</i> | 4 | √ | GEN/AMK/ERY/Q-D/RIF                 | <i>cylA-esp-asa1-efaAfs-ace</i>          |
| HP1CQ    | pet cat | <i>E. hirae</i>    | 2 |   | ERY/TET                             |                                          |
| HP2CQ    | pet cat | <i>E. faecalis</i> | 4 | √ | GEN/AMK/ERY/CIP/TET                 | <i>gelE-efaAfs-ace</i>                   |



|        |         |                    |   |   |   |                                 |                                      |
|--------|---------|--------------------|---|---|---|---------------------------------|--------------------------------------|
| HP3CQ  | pet cat | <i>E. faecalis</i> | 7 | √ |   | GEN/AMK/ERY/Q-D/LZD/CIP/RIF/TET | <i>asa1-efaAfs-ace</i>               |
| HP5CQ  | pet cat | <i>E. faecium</i>  | 6 | √ |   | GEN/AMK/ERY/Q-D/CIP/RIF/TET     | <i>efaAfm</i>                        |
| HP6CQ  | pet cat | <i>E. faecium</i>  | 5 | √ |   | GEN/AMK/AMP/ERY/NIT/CIP         | <i>efaAfm</i>                        |
| HP7CQ  | pet cat | <i>E. faecalis</i> | 5 | √ |   | GEN/AMK/ERY/Q-D/RIF/TET         | <i>cylA-esp-asa1-efaAfs-ace</i>      |
| HP10CQ | pet cat | <i>E. faecalis</i> | 6 | √ |   | GEN/AMK/ERY/Q-D/MUP/RIF/TET     | <i>cylA-esp-asa1-efaAfs-ace</i>      |
| HP12CQ | pet cat | <i>E. faecium</i>  | 6 | √ |   | GEN/AMK/ERY/Q-D/NIT/CIP/TET     | <i>efaAfm</i>                        |
| HP13CQ | pet cat | <i>E. faecalis</i> | 4 | √ | √ | GEN/AMK/ERY/Q-D/TET             |                                      |
| HP15CQ | pet cat | <i>E. faecium</i>  | 2 |   |   | AMK/RIF                         | <i>efaAfm</i>                        |
| HP16CQ | pet cat | <i>E. faecalis</i> | 6 | √ |   | GEN/AMK/ERY/Q-D/CIP/RIF/TET     | <i>esp-asa1-gelE-efaAfs-hyl-ace</i>  |
| HP17CQ | pet cat | <i>E. hirae</i>    | 4 | √ |   | GEN/AMK/ERY/Q-D/TET             |                                      |
| HP19CQ | pet cat | <i>E. hirae</i>    | 4 | √ |   | GEN/AMK/ERY/Q-D/TET             |                                      |
| HP20CQ | pet cat | <i>E. faecium</i>  | 7 | √ |   | GEN/AMK/AMP/ERY/LZD/NIT/CIP/TET | <i>efaAfm</i>                        |
| HP21CQ | pet cat | <i>E. faecalis</i> | 2 |   |   | ERY/RIF                         | <i>efaAfm</i>                        |
| HP23CQ | pet cat | <i>E. faecium</i>  | 1 |   |   | ERY                             | <i>esp-efaAfm</i>                    |
| HP24CQ | pet cat | <i>E. faecium</i>  | 2 |   |   | NIT/RIF                         | <i>efaAfm</i>                        |
| HP25CQ | pet cat | <i>E. faecalis</i> | 3 |   |   | ERY/Q-D/TET                     | <i>esp-asa1-gelE-efaAfs-ace</i>      |
| HP26CQ | pet cat | <i>E. faecium</i>  | 5 | √ |   | GEN/AMK/AMP/ERY/NIT/TET         | <i>efaAfm</i>                        |
| HP28CQ | pet cat | <i>E. faecalis</i> | 7 | √ |   | GEN/AMK/ERY/Q-D/MUP/CIP/RIF/TET | <i>cylA-esp-asa1-efaAfs-ace</i>      |
| HP29CQ | pet cat | <i>E. faecium</i>  | 7 | √ |   | GEN/AMK/AMP/ERY/NIT/CIP/RIF/TET | <i>efaAfm</i>                        |
| HP30CQ | pet cat | <i>E. faecium</i>  | 5 | √ |   | GEN/AMK/AMP/ERY/NIT/TET         | <i>efaAfm</i>                        |
| HP31CQ | pet cat | <i>E. faecalis</i> | 4 | √ |   | AMK/Q-D/RIF/TET                 | <i>esp-asa1-gelE-efaAfs-ace</i>      |
| HP32CQ | pet cat | <i>E. hirae</i>    | 1 |   |   | TET                             |                                      |
| HP34CQ | pet cat | <i>E. faecalis</i> | 7 | √ |   | GEN/AMK/ERY/Q-D/LZD/MUP/CIP/TET | <i>cylA-esp-asa1-gelE-efaAfs-ace</i> |
| HP36CQ | pet cat | <i>E. faecium</i>  | 2 |   |   | ERY/RIF                         | <i>efaAfm</i>                        |
| HP38CQ | pet cat | <i>E. hirae</i>    | 1 |   |   | TET                             |                                      |
| HP39CQ | pet cat | <i>E. faecium</i>  | 7 | √ |   | GEN/AMK/AMP/ERY/NIT/CIP/RIF/TET | <i>efaAfm</i>                        |
| HP40CQ | pet cat | <i>E. faecium</i>  | 7 | √ |   | GEN/AMK/AMP/ERY/NIT/CIP/RIF/TET | <i>efaAfm</i>                        |
| HP41CQ | pet cat | <i>E. faecalis</i> | 5 | √ |   | GEN/AMK/ERY/Q-D/RIF/TET         | <i>cylA-esp-asa1-efaAfs-ace</i>      |
| HP42CQ | pet cat | <i>E. faecalis</i> | 6 | √ |   | GEN/AMK/ERY/Q-D/CIP/RIF/TET     | <i>cylA-esp-asa1-efaAfs-ace</i>      |

|        |         |                    |   |   |                                     |                                 |
|--------|---------|--------------------|---|---|-------------------------------------|---------------------------------|
| HP43CQ | pet cat | <i>E. faecalis</i> | 5 | √ | GEN/AMK/ERY/Q-D/RIF/TET             | <i>cylA-esp-asa1-efaAfs-ace</i> |
| HP44CQ | pet cat | <i>E. faecium</i>  | 7 | √ | GEN/AMK/AMP/ERY/NIT/CIP/RIF/TET     | <i>efaAfm</i>                   |
| HP45CQ | pet cat | <i>E. faecium</i>  | 5 | √ | GEN/AMK/ERY/Q-D/RIF/TET             | <i>efaAfm</i>                   |
| HP46CQ | pet cat | <i>E. faecalis</i> | 6 | √ | GEN/AMK/ERY/Q-D/CIP/RIF/TET         | <i>cylA-esp-asa1-efaAfs-ace</i> |
| HP47CQ | pet cat | <i>E. hirae</i>    | 1 |   | TET                                 |                                 |
| HP48CQ | pet cat | <i>E. hirae</i>    | 3 |   | AMK/ERY/Q-D                         |                                 |
| HP49CQ | pet cat | <i>E. hirae</i>    | 3 |   | AMK/ERY/Q-D                         |                                 |
| HP50CQ | pet cat | <i>E. faecalis</i> | 7 | √ | GEN/AMK/ERY/Q-D/LZD/MUP/CIP/RIF     | <i>efaAfs-ace</i>               |
| HP51CQ | pet cat | <i>E. faecium</i>  | 3 |   | ERY/Q-D/RIF                         | <i>efaAfm</i>                   |
| HP52CQ | pet cat | <i>E. hirae</i>    | 3 |   | AMK/ERY/Q-D                         |                                 |
| HP53CQ | pet cat | <i>E. faecalis</i> | 5 | √ | GEN/AMK/ERY/Q-D/CIP/TET             | <i>asa1-efaAfs-ace</i>          |
| HP54CQ | pet cat | <i>E. faecium</i>  | 6 | √ | GEN/AMK/AMP/ERY/Q-D/CIP/TET         | <i>efaAfm</i>                   |
| HP55CQ | pet cat | <i>E. faecium</i>  | 2 |   | Q-D/NIT                             | <i>efaAfm</i>                   |
| HP56CQ | pet cat | <i>E. faecium</i>  | 2 |   | ERY/NIT                             | <i>efaAfm</i>                   |
| HP58CQ | pet cat | <i>E. faecium</i>  | 5 | √ | GEN/AMK/AMP/ERY/NIT/TET             | <i>efaAfm</i>                   |
| HP59CQ | pet cat | <i>E. faecium</i>  | 6 | √ | GEN/AMK/AMP/ERY/CIP/RIF/TET         | <i>efaAfm</i>                   |
| HP60CQ | pet cat | <i>E. faecium</i>  | 8 | √ | GEN/AMK/AMP/ERY/Q-D/NIT/CIP/RIF/TET | <i>efaAfm</i>                   |
| HP61CQ | pet cat | <i>E. hirae</i>    | 0 |   |                                     |                                 |
| HP62CQ | pet cat | <i>E. faecium</i>  | 7 | √ | GEN/AMK/AMP/ERY/NIT/CIP/RIF/TET     | <i>efaAfm</i>                   |
| HP63CQ | pet cat | <i>E. faecium</i>  | 6 | √ | GEN/AMK/ERY/NIT/CIP/RIF/TET         | <i>efaAfm</i>                   |
| HP64CQ | pet cat | <i>E. faecium</i>  | 7 | √ | GEN/AMK/AMP/ERY/NIT/CIP/RIF/TET     | <i>efaAfm</i>                   |
| HP65CQ | pet cat | <i>E. faecium</i>  | 6 | √ | GEN/AMK/AMP/ERY/NIT/CIP/TET         | <i>efaAfm</i>                   |
| HP66CQ | pet cat | <i>E. faecium</i>  | 5 | √ | GEN/ERY/Q-D/RIF/TET                 | <i>efaAfm</i>                   |
| HP67CQ | pet cat | <i>E. faecium</i>  | 5 | √ | GEN/AMK/AMP/ERY/CIP/TET             | <i>efaAfm</i>                   |
| HP68CQ | pet cat | <i>E. faecium</i>  | 5 | √ | GEN/AMK/ERY/Q-D/RIF/TET             | <i>efaAfm</i>                   |
| HP69CQ | pet cat | <i>E. faecium</i>  | 1 |   | NIT                                 | <i>efaAfm</i>                   |
| HP70CQ | pet cat | <i>E. faecium</i>  | 6 | √ | GEN/AMK/AMP/ERY/NIT/CIP/TET         | <i>efaAfm</i>                   |
| HP71CQ | pet cat | <i>E. faecium</i>  | 3 |   | Q-D/NIT/RIF                         | <i>efaAfm</i>                   |
| HP72CQ | pet cat | <i>E. faecalis</i> | 6 | √ | GEN/AMK/ERY/Q-D/CIP/RIF/TET         | <i>cylA-asa1-efaAfs-ace</i>     |

|         |         |                      |   |   |   |                                 |                                          |
|---------|---------|----------------------|---|---|---|---------------------------------|------------------------------------------|
| HP74CQ  | pet cat | <i>E. hirae</i>      | 0 |   |   |                                 |                                          |
| HP75CQ  | pet cat | <i>E. faecalis</i>   | 5 | √ |   | GEN/AMK/ERY/Q-D/RIF/TET         | <i>cylA-esp-asa1-efaAfs-ace</i>          |
| HP76CQ  | pet cat | <i>E. faecalis</i>   | 6 | √ |   | GEN/AMK/ERY/Q-D/LZD/CIP/TET     | <i>cylA-esp-asa1-efaAfs-ace</i>          |
| HP77CQ  | pet cat | <i>E. hirae</i>      | 1 |   |   | TET                             |                                          |
| HP79CQ  | pet cat | <i>E. faecalis</i>   | 5 | √ |   | GEN/AMK/ERY/Q-D/RIF/TET         | <i>cylA-esp-asa1-efaAfs-ace</i>          |
| HP80CQ  | pet cat | <i>E. faecium</i>    | 5 | √ |   | GEN/AMK/AMP/ERY/NIT/TET         | <i>efaAfm</i>                            |
| HP81CQ  | pet cat | <i>E. hirae</i>      | 0 |   |   |                                 |                                          |
| HP82CQ  | pet cat | <i>E. faecium</i>    | 5 | √ |   | GEN/AMK/AMP/ERY/CIP/TET         | <i>efaAfm</i>                            |
| HP85CQ  | pet cat | <i>E. hirae</i>      | 1 |   |   | Q-D                             |                                          |
| HP87CQ  | pet cat | <i>E. faecalis</i>   | 6 | √ |   | GEN/AMK/ERY/Q-D/CIP/RIF/TET     | <i>asa1-efaAfs-ace</i>                   |
| HP88CQ  | pet cat | <i>E. faecium</i>    | 7 | √ |   | GEN/AMK/AMP/ERY/NIT/CIP/RIF/TET | <i>efaAfm</i>                            |
| HP90CQ  | pet cat | <i>E. faecium</i>    | 4 |   |   | ERY/NIT/CIP/RIF                 | <i>efaAfm</i>                            |
| HP92CQ  | pet cat | <i>E. faecium</i>    | 5 | √ |   | GEN/AMK/AMP/ERY/CIP/TET         | <i>efaAfm</i>                            |
| HP93CQ  | pet cat | <i>E. faecalis</i>   | 4 |   |   | AMK/Q-D/CIP/RIF                 | <i>gelE-efaAfs-hyl-ace</i>               |
| HP94CQ  | pet cat | <i>E. faecium</i>    | 7 | √ |   | GEN/AMK/AMP/ERY/NIT/CIP/RIF/TET | <i>efaAfm</i>                            |
| HP95CQ  | pet cat | <i>E. faecium</i>    | 7 | √ |   | GEN/AMK/AMP/ERY/NIT/CIP/RIF/TET | <i>efaAfm</i>                            |
| HP100CQ | pet cat | <i>E. faecalis</i>   | 6 | √ | √ | GEN/AMK/ERY/Q-D/CIP/RIF/TET     |                                          |
| HP101CQ | pet cat | <i>E. faecalis</i>   | 3 |   |   | AMK/Q-D/RIF                     | <i>gelE-efaAfs-hyl-ace</i>               |
| HP102CQ | pet cat | <i>E. faecium</i>    | 5 | √ |   | GEN/AMK/AMP/ERY/CIP/TET         | <i>efaAfm</i>                            |
| HP106CQ | pet cat | <i>E. gallinarum</i> | 6 | √ |   | GEN/AMK/TEC/LZD/MUP/CIP/TET     |                                          |
| HP107CQ | pet cat | <i>E. faecium</i>    | 7 | √ |   | GEN/AMK/AMP/ERY/Q-D/NIT/CIP/TET | <i>efaAfm</i>                            |
| HP108CQ | pet cat | <i>E. faecalis</i>   | 3 |   |   | AMK/Q-D/RIF                     | <i>esp-asa1-gelE-efaAfs-hyl-ace</i>      |
| HP109CQ | pet cat | <i>E. faecalis</i>   | 3 |   |   | AMK/Q-D/RIF                     | <i>esp-asa1-gelE-efaAfs-hyl-ace</i>      |
| HP110CQ | pet cat | <i>E. faecium</i>    | 5 | √ |   | GEN/AMK/AMP/ERY/CIP/TET         | <i>efaAfm</i>                            |
| HP111CQ | pet cat | <i>E. faecalis</i>   | 7 | √ |   | GEN/AMK/ERY/Q-D/MUP/CIP/RIF/TET | <i>esp-asa1-gelE-efaAfs-hyl-ace</i>      |
| HP112CQ | pet cat | <i>E. faecalis</i>   | 5 |   |   | AMK/Q-D/CIP/RIF/TET             | <i>cylA-esp-asa1-gelE-efaAfs-hyl-ace</i> |
| HP114CQ | pet cat | <i>E. hirae</i>      | 4 | √ |   | GEN/AMK/ERY/Q-D/TET             |                                          |
| HP115CQ | pet cat | <i>E. faecalis</i>   | 7 | √ |   | GEN/ERY/Q-D/LZD/MUP/CIP/TET     | <i>cylA-asa1-efaAfs-ace</i>              |
| HP116CQ | pet cat | <i>E. faecium</i>    | 4 |   |   | AMP/ERY/NIT/TET                 | <i>efaAfm</i>                            |

|         |         |                      |   |   |                                         |                                 |
|---------|---------|----------------------|---|---|-----------------------------------------|---------------------------------|
| HP117CQ | pet cat | <i>E. faecium</i>    | 4 |   | AMP/ERY/NIT/TET                         | <i>efaAfm</i>                   |
| HP118CQ | pet cat | <i>E. faecalis</i>   | 5 | √ | GEN/AMK/ERY/Q-D/RIF/TET                 | <i>cylA-esp-asaI-efaAfs-ace</i> |
| HP120CQ | pet cat | <i>E. faecium</i>    | 1 |   | ERY                                     | <i>efaAfm</i>                   |
| HP121CQ | pet dog | <i>E. faecium</i>    | 8 | √ | GEN/AMK/AMP/ERY/Q-D/NIT/CIP/RIF/TET     | <i>efaAfm</i>                   |
| HP122CQ | pet dog | <i>E. gallinarum</i> | 4 | √ | GEN/TEC/LZD/MUP                         |                                 |
| HP123CQ | pet dog | <i>E. faecalis</i>   | 5 |   | ERY/Q-D/NIT/RIF/TET                     | <i>efaAfm</i>                   |
| HP124CQ | pet dog | <i>E. faecium</i>    | 5 |   | ERY/Q-D/NIT/RIF/TET                     | <i>efaAfm</i>                   |
| HP125CQ | pet dog | <i>E. faecium</i>    | 9 | √ | GEN/AMK/AMP/ERY/Q-D/LZD/NIT/CIP/RIF/TET | <i>efaAfm</i>                   |
| HP126CQ | pet dog | <i>E. faecium</i>    | 4 |   | ERY/Q-D/RIF/TET                         | <i>efaAfm</i>                   |
| HP127CQ | pet dog | <i>E. faecalis</i>   | 0 |   |                                         |                                 |
| HP128CQ | pet dog | <i>E. faecium</i>    | 2 |   | ERY/RIF                                 | <i>efaAfm</i>                   |
| HP129CQ | pet dog | <i>E. faecalis</i>   | 8 | √ | GEN/AMK/ERY/Q-D/LZD/MUP/CIP/RIF/TET     | <i>gelE-efaAfs-hyl-ace</i>      |
| HP130CQ | pet dog | <i>E. faecium</i>    | 4 |   | ERY/Q-D/RIF/TET                         | <i>efaAfm</i>                   |
| HP131CQ | pet dog | <i>E. faecium</i>    | 3 | √ | GEN/AMK/ERY/TET                         |                                 |
| HP132CQ | pet dog | <i>E. faecium</i>    | 6 | √ | GEN/ERY/Q-D/NIT/RIF/TET                 | <i>efaAfm</i>                   |
| HP133CQ | pet dog | <i>E. faecium</i>    | 6 | √ | GEN/ERY/Q-D/CIP/RIF/TET                 | <i>efaAfm</i>                   |
| HP134CQ | pet dog | <i>E. faecium</i>    | 3 |   | Q-D/RIF/TET                             | <i>efaAfm</i>                   |
| HP135CQ | pet dog | <i>E. faecium</i>    | 7 | √ | GEN/ERY/Q-D/NIT/CIP/RIF/TET             | <i>efaAfm</i>                   |
| HP136CQ | pet dog | <i>E. faecalis</i>   | 6 | √ | GEN/AMK/ERY/Q-D/LZD/RIF/TET             | <i>asaI-gelE-efaAfs-hyl-ace</i> |
| HP137CQ | pet dog | <i>E. faecalis</i>   | 5 | √ | GEN/AMK/ERY/Q-D/LZD/TET                 | <i>asaI-gelE-efaAfs-hyl-ace</i> |
| HP138CQ | pet dog | <i>E. hirae</i>      | 3 |   | ERY/Q-D/TET                             |                                 |
| HP140CQ | pet dog | <i>E. faecium</i>    | 4 |   | NIT/CIP/RIF/TET                         | <i>efaAfm</i>                   |
| HP141CQ | pet dog | <i>E. faecium</i>    | 5 |   | ERY/NIT/CIP/RIF/TET                     | <i>efaAfm</i>                   |
| HP142CQ | pet dog | <i>E. faecium</i>    | 4 |   | NIT/CIP/RIF/TET                         | <i>efaAfm</i>                   |
| HP143CQ | pet dog | <i>E. faecium</i>    | 4 |   | NIT/CIP/RIF/TET                         | <i>efaAfm</i>                   |
| HP144CQ | pet dog | <i>E. faecalis</i>   | 2 |   | AMK/Q-D                                 | <i>gelE-efaAfs-hyl-ace</i>      |
| HP145CQ | pet dog | <i>E. faecalis</i>   | 4 |   | AMK/Q-D/RIF/TET                         | <i>gelE-efaAfs-hyl-ace</i>      |
| HP146CQ | pet dog | <i>E. faecium</i>    | 4 |   | TEC/LZD/NIT/TET                         |                                 |
| HP147CQ | pet dog | <i>E. faecium</i>    | 3 |   | MUP/RIF/TET                             |                                 |

|         |         |                      |   |   |                                 |                                          |
|---------|---------|----------------------|---|---|---------------------------------|------------------------------------------|
| HP148CQ | pet dog | <i>E. faecalis</i>   | 4 |   | AMK/ERY/Q-D/TET                 | <i>esp-gelE-efaAfs-ace</i>               |
| HP149CQ | pet dog | <i>E. gallinarum</i> | 3 |   | ERY/MUP/CIP                     | <i>efaAfm</i>                            |
| HP150CQ | pet dog | <i>E. hirae</i>      | 2 |   | ERY/TET                         |                                          |
| HP151CQ | pet dog | <i>E. hirae</i>      | 1 |   | TET                             |                                          |
| HP152CQ | pet dog | <i>E. hirae</i>      | 2 |   | ERY/TET                         |                                          |
| HP153CQ | pet dog | <i>E. hirae</i>      | 2 |   | ERY/TET                         |                                          |
| HP154CQ | pet dog | <i>E. hirae</i>      | 2 |   | Q-D/TET                         |                                          |
| HP155CQ | pet dog | <i>E. faecium</i>    | 0 |   |                                 |                                          |
| HP156CQ | pet dog | <i>E. faecium</i>    | 6 |   | AMK/TEC/ERY/LZD/NIT/TET         |                                          |
| HP157CQ | pet dog | <i>E. faecium</i>    | 0 |   |                                 |                                          |
| HP158CQ | pet dog | <i>E. faecium</i>    | 0 |   |                                 |                                          |
| HP159CQ | pet dog | <i>E. faecium</i>    | 4 |   | ERY/LZD/NIT/TET                 |                                          |
| HP160CQ | pet dog | <i>E. faecium</i>    | 3 |   | LZD/NIT/TET                     |                                          |
| HP161CQ | pet dog | <i>E. faecium</i>    | 0 |   |                                 |                                          |
| HP163CQ | pet dog | <i>E. faecalis</i>   | 7 | √ | GEN/AMK/Q-D/LZD/MUP/CIP/RIF/TET | <i>gelE-efaAfs-hyl-ace</i>               |
| HP165CQ | pet dog | <i>E. hirae</i>      | 5 |   | TEC/ERY/LZD/CIP/TET             |                                          |
| HP166CQ | pet dog | <i>E. hirae</i>      | 2 |   | ERY/TET                         |                                          |
| HP167CQ | pet dog | <i>E. hirae</i>      | 2 |   | ERY/TET                         |                                          |
| HP168CQ | pet dog | <i>E. hirae</i>      | 1 |   | TET                             |                                          |
| HP169CQ | pet dog | <i>E. faecalis</i>   | 2 |   | NIT/TET                         | <i>efaAfm</i>                            |
| HP170CQ | pet dog | <i>E. hirae</i>      | 1 |   | TET                             |                                          |
| HP171CQ | pet dog | <i>E. faecium</i>    | 2 |   | NIT/TET                         | <i>efaAfm</i>                            |
| HP172CQ | pet dog | <i>E. hirae</i>      | 3 |   | ERY/RIF/TET                     |                                          |
| HP173CQ | pet dog | <i>E. hirae</i>      | 2 |   | ERY/TET                         |                                          |
| HP174CQ | pet dog | <i>E. faecium</i>    | 0 |   |                                 |                                          |
| HP175CQ | pet dog | <i>E. faecium</i>    | 6 |   | TEC/ERY/Q-D/LZD/NIT/TET         |                                          |
| HP177CQ | pet dog | <i>E. faecalis</i>   | 6 | √ | AMK/TEC/VAN/Q-D/LZD/RIF/TET     | <i>cylA-esp-asaI-gelE-efaAfs-hyl-ace</i> |
| HP178CQ | pet dog | <i>E. faecium</i>    | 3 |   | LZD/NIT/TET                     |                                          |
| HP179CQ | pet dog | <i>E. faecium</i>    | 3 |   | ERY/NIT/RIF                     | <i>efaAfm</i>                            |

|         |         |                    |    |   |                                             |                                          |
|---------|---------|--------------------|----|---|---------------------------------------------|------------------------------------------|
| HP180CQ | pet dog | <i>E. faecium</i>  | 3  |   | ERY/RIF/TET                                 | <i>efaAfm</i>                            |
| HP181CQ | pet dog | <i>E. hirae</i>    | 2  |   | ERY/TET                                     |                                          |
| HP182CQ | pet dog | <i>E. hirae</i>    | 1  |   | TET                                         |                                          |
| HP183CQ | pet dog | <i>E. hirae</i>    | 2  |   | ERY/TET                                     |                                          |
| HP185CQ | pet dog | <i>E. hirae</i>    | 2  |   | ERY/TET                                     |                                          |
| HP186CQ | pet dog | <i>E. hirae</i>    | 3  |   | ERY/LZD/TET                                 |                                          |
| HP187CQ | pet dog | <i>E. faecium</i>  | 2  |   | NIT/TET                                     |                                          |
| HP188CQ | pet dog | <i>E. hirae</i>    | 2  |   | NIT/TET                                     |                                          |
| HP190CQ | pet dog | <i>E. faecium</i>  | 2  |   | NIT/TET                                     |                                          |
| HP191CQ | pet dog | <i>E. faecium</i>  | 4  |   | ERY/NIT/RIF/TET                             | <i>efaAfm</i>                            |
| HP192CQ | pet dog | <i>E. hirae</i>    | 5  |   | ERY/Q-D/LZD/NIT/TET                         |                                          |
| HP194CQ | pet dog | <i>E. faecium</i>  | 4  |   | AMP/ERY/NIT/TET                             | <i>efaAfm</i>                            |
| HP197CQ | pet dog | <i>E. faecium</i>  | 4  |   | ERY/LZD/NIT/TET                             |                                          |
| HP198CQ | pet dog | <i>E. faecium</i>  | 3  |   | CIP/RIF/TET                                 | <i>efaAfm</i>                            |
| HP199CQ | pet dog | <i>E. faecium</i>  | 4  |   | NIT/CIP/RIF/TET                             | <i>efaAfm</i>                            |
| HP200CQ | pet dog | <i>E. faecalis</i> | 3  |   | AMK/Q-D/RIF                                 | <i>asa1-gelE-efaAfs-hyl-ace</i>          |
| HP201CQ | pet dog | <i>E. faecium</i>  | 4  | √ | GEN/AMK/AMP/RIF/TET                         | <i>efaAfm</i>                            |
| HP202CQ | pet dog | <i>E. faecalis</i> | 10 | √ | GEN/AMK/TEC/ERY/Q-D/LZD/MUP/NIT/CIP/RIF/TET | <i>asa1-gelE-efaAfs-hyl-ace</i>          |
| HP203CQ | pet dog | <i>E. faecium</i>  | 1  |   | Q-D                                         | <i>efaAfm</i>                            |
| HP204CQ | pet dog | <i>E. hirae</i>    | 1  |   | TET                                         |                                          |
| HP205CQ | pet dog | <i>E. hirae</i>    | 1  |   | TET                                         |                                          |
| HP206CQ | pet dog | <i>E. faecium</i>  | 2  |   | NIT/TET                                     | <i>efaAfm</i>                            |
| HP207CQ | pet dog | <i>E. faecium</i>  | 8  |   | AMK/AMP/ERY/Q-D/LZD/NIT/RIF/TET             | <i>efaAfm</i>                            |
| HP210CQ | pet dog | <i>E. hirae</i>    | 1  |   | TET                                         |                                          |
| HP213CQ | pet dog | <i>E. faecalis</i> | 7  | √ | GEN/AMK/ERY/Q-D/LZD/CIP/RIF/TET             | <i>esp-asa1-gelE-efaAfs-efaAfm-ace</i>   |
| HP214CQ | pet dog | <i>E. faecalis</i> | 8  | √ | GEN/AMK/ERY/Q-D/LZD/MUP/CIP/RIF/TET         | <i>cylA-esp-asa1-gelE-efaAfs-hyl-ace</i> |
| HP216CQ | pet dog | <i>E. faecalis</i> | 6  | √ | GEN/AMK/Q-D/LZD/MUP/CIP/RIF                 | <i>efaAfs-hyl-ace</i>                    |
| HP217CQ | pet dog | <i>E. faecium</i>  | 6  | √ | GEN/AMK/ERY/Q-D/NIT/CIP/TET                 | <i>efaAfm</i>                            |
| HP219CQ | pet dog | <i>E. faecium</i>  | 4  | √ | GEN/AMK/AMP/ERY/TET                         |                                          |

|         |         |                      |   |   |                                     |                                        |
|---------|---------|----------------------|---|---|-------------------------------------|----------------------------------------|
| HP220CQ | pet dog | <i>E. faecium</i>    | 3 |   | ERY/NIT/RIF                         | <i>efaAfm</i>                          |
| HP222CQ | pet dog | <i>E. faecium</i>    | 3 |   | ERY/NIT/RIF                         | <i>efaAfm</i>                          |
| HP224CQ | pet dog | <i>E. faecalis</i>   | 5 | √ | GEN/AMK/ERY/Q-D/RIF/TET             | <i>asa1-gelE-efaAfs-hyl-ace</i>        |
| HP225CQ | pet dog | <i>E. faecium</i>    | 4 |   | ERY/Q-D/RIF/TET                     | <i>efaAfm</i>                          |
| HP226CQ | pet dog | <i>E. faecium</i>    | 7 | √ | GEN/AMK/AMP/ERY/Q-D/CIP/RIF/TET     | <i>efaAfm</i>                          |
| HP228CQ | pet dog | <i>E. faecium</i>    | 4 |   | ERY/Q-D/NIT/RIF                     | <i>efaAfm</i>                          |
| HP230CQ | pet dog | <i>E. faecium</i>    | 4 |   | ERY/Q-D/RIF/TET                     | <i>efaAfm</i>                          |
| HP231CQ | pet dog | <i>E. faecium</i>    | 3 |   | NIT/CIP/TET                         | <i>efaAfm</i>                          |
| HP232CQ | pet dog | <i>E. faecium</i>    | 6 |   | AMP/ERY/Q-D/CIP/RIF/TET             | <i>efaAfm</i>                          |
| HP233CQ | pet dog | <i>E. faecium</i>    | 4 |   | ERY/Q-D/RIF/TET                     | <i>efaAfm</i>                          |
| HP235CQ | pet dog | <i>E. hirae</i>      | 3 |   | LZD/NIT/TET                         |                                        |
| HP236CQ | pet dog | <i>E. hirae</i>      | 3 |   | LZD/NIT/TET                         |                                        |
| HP237CQ | pet dog | <i>E. avium</i>      | 0 |   |                                     |                                        |
| HP238CQ | pet dog | <i>E. gallinarum</i> | 8 | √ | GEN/AMK/TEC/ERY/Q-D/LZD/MUP/CIP/TET |                                        |
| HP239CQ | pet dog | <i>E. faecium</i>    | 5 | √ | GEN/AMK/AMP/NIT/CIP/TET             | <i>efaAfm</i>                          |
| HP240CQ | pet dog | <i>E. faecium</i>    | 3 |   | ERY/RIF/TET                         | <i>efaAfm</i>                          |
| HP241CQ | pet dog | <i>E. faecalis</i>   | 8 | √ | GEN/AMK/TEC/ERY/Q-D/LZD/MUP/CIP/TET | <i>asa1-efaAfs-ace</i>                 |
| HP242CQ | pet dog | <i>E. faecalis</i>   | 5 |   | AMK/ERY/Q-D/RIF/TET                 | <i>esp-asa1-gelE-efaAfs-efaAfm-ace</i> |
| HP243CQ | pet dog | <i>E. faecium</i>    | 6 |   | ERY/Q-D/NIT/CIP/RIF/TET             | <i>efaAfm</i>                          |
| HP245CQ | pet dog | <i>E. faecium</i>    | 5 |   | ERY/NIT/CIP/RIF/TET                 | <i>efaAfm</i>                          |
| HP246CQ | pet dog | <i>E. faecium</i>    | 6 |   | AMP/ERY/NIT/CIP/RIF/TET             |                                        |
| HP247CQ | pet dog | <i>E. faecium</i>    | 7 | √ | GEN/AMK/AMP/ERY/Q-D/NIT/CIP/TET     | <i>efaAfm</i>                          |
| HP248CQ | pet dog | <i>E. faecalis</i>   | 7 | √ | GEN/AMK/ERY/Q-D/LZD/CIP/RIF/TET     | <i>esp-asa1-gelE-efaAfs-efaAfm-ace</i> |
| HP249CQ | pet dog | <i>E. hirae</i>      | 3 |   | ERY/MUP/TET                         |                                        |
| HP250CQ | pet dog | <i>E. faecium</i>    | 7 | √ | GEN/AMK/AMP/ERY/LZD/NIT/CIP/TET     | <i>efaAfm</i>                          |
| HP251CQ | pet dog | <i>E. faecium</i>    | 4 |   | ERY/Q-D/RIF/TET                     | <i>efaAfm</i>                          |
| HP252CQ | pet dog | <i>E. faecium</i>    | 6 | √ | GEN/AMK/AMP/ERY/CIP/RIF/TET         | <i>efaAfm</i>                          |
| HP253CQ | pet dog | <i>E. faecium</i>    | 6 | √ | GEN/AMK/AMP/ERY/Q-D/NIT/TET         | <i>efaAfm</i>                          |
| HP254CQ | pet dog | <i>E. faecalis</i>   | 7 | √ | GEN/AMK/ERY/Q-D/LZD/MUP/NIT/TET     | <i>asa1-gelE-efaAfs-hyl-ace</i>        |

|         |         |                      |   |   |                                     |                                        |
|---------|---------|----------------------|---|---|-------------------------------------|----------------------------------------|
| HP255CQ | pet dog | <i>E. faecium</i>    | 3 |   | Q-D/NIT/RIF                         | <i>efaAfm</i>                          |
| HP256CQ | pet dog | <i>E. faecium</i>    | 6 |   | AMK/ERY/Q-D/NIT/RIF/TET             | <i>efaAfm</i>                          |
| HP257CQ | pet dog | <i>E. faecium</i>    | 1 |   | RIF                                 | <i>efaAfm</i>                          |
| HP259CQ | pet dog | <i>E. faecalis</i>   | 5 | √ | GEN/AMK/Q-D/LZD/MUP/CIP             | <i>asa1-gelE-efaAfs-hyl-efaAfm-ace</i> |
| HP260CQ | pet dog | <i>E. faecalis</i>   | 5 |   | AMK/ERY/Q-D/RIF/TET                 | <i>esp-asa1-gelE-efaAfs-efaAfm-ace</i> |
| HP261CQ | pet dog | <i>E. faecalis</i>   | 5 |   | AMK/ERY/Q-D/RIF/TET                 | <i>esp-asa1-gelE-efaAfs-efaAfm-ace</i> |
| HP262CQ | pet dog | <i>E. faecium</i>    | 7 |   | AMK/AMP/ERY/Q-D/CIP/RIF/TET         | <i>efaAfm</i>                          |
| HP263CQ | pet dog | <i>E. faecium</i>    | 4 |   | ERY/Q-D/RIF/TET                     | <i>efaAfm</i>                          |
| HP265CQ | pet dog | <i>E. faecalis</i>   | 4 |   | AMK/ERY/Q-D/TET                     | <i>cylA-esp-asa1-gelE-efaAfs-ace</i>   |
| HP266CQ | pet dog | <i>E. faecalis</i>   | 7 | √ | GEN/AMK/ERY/Q-D/LZD/CIP/RIF/TET     | <i>asa1-efaAfs-ace</i>                 |
| HP267CQ | pet dog | <i>E. faecium</i>    | 5 | √ | GEN/AMK/AMP/ERY/NIT/TET             | <i>efaAfm</i>                          |
| HP269CQ | pet dog | <i>E. faecium</i>    | 8 | √ | GEN/AMK/AMP/ERY/Q-D/NIT/CIP/RIF/TET | <i>efaAfm</i>                          |
| HP270CQ | pet dog | <i>E. faecalis</i>   | 6 | √ | GEN/AMK/ERY/Q-D/CIP/RIF/TET         | <i>cylA-esp-asa1-efaAfs-ace</i>        |
| HP271CQ | pet dog | <i>E. faecium</i>    | 1 |   | TET                                 | <i>efaAfm</i>                          |
| HP272CQ | pet dog | <i>E. faecalis</i>   | 5 |   | AMK/ERY/Q-D/RIF/TET                 | <i>esp-asa1-gelE-efaAfs-ace</i>        |
| HP273CQ | pet dog | <i>E. faecalis</i>   | 8 |   | TEC/ERY/Q-D/LZD/MUP/CIP/RIF/TET     | <i>cylA-esp-asa1-gelE-efaAfs-ace</i>   |
| HP275CQ | pet dog | <i>E. faecium</i>    | 4 |   | ERY/Q-D/RIF/TET                     |                                        |
| HP276CQ | pet dog | <i>E. faecium</i>    | 3 |   | NIT/CIP/TET                         | <i>efaAfm</i>                          |
| HP277CQ | pet dog | <i>E. faecalis</i>   | 5 |   | AMK/Q-D/LZD/CIP/RIF                 | <i>gelE-efaAfs-hyl-ace</i>             |
| HP278CQ | pet dog | <i>E. faecium</i>    | 6 | √ | GEN/AMK/AMP/ERY/CIP/RIF/TET         | <i>efaAfm</i>                          |
| HP279CQ | pet dog | <i>E. hirae</i>      | 3 |   | ERY/Q-D/TET                         |                                        |
| HP280CQ | pet dog | <i>E. hirae</i>      | 1 |   | TET                                 |                                        |
| HP281CQ | pet dog | <i>E. faecalis</i>   | 4 | √ | GEN/AMK/ERY/Q-D/TET                 | <i>asa1-gelE-efaAfs-hyl-ace</i>        |
| HP282CQ | pet dog | <i>E. faecalis</i>   | 6 |   | AMK/Q-D/LZD/MUP/CIP/RIF             | <i>gelE-efaAfs-hyl-ace</i>             |
| HP283CQ | pet dog | <i>E. hirae</i>      | 1 |   | TET                                 |                                        |
| HP284CQ | pet dog | <i>E. gallinarum</i> | 5 | √ | GEN/TEC/LZD/MUP/CIP                 |                                        |
| HP286CQ | pet dog | <i>E. hirae</i>      | 2 |   | RIF/TET                             |                                        |
| HP287CQ | pet dog | <i>E. faecium</i>    | 2 |   | CIP/TET                             | <i>efaAfm</i>                          |
| HP288CQ | pet dog | <i>E. faecium</i>    | 1 |   | TET                                 |                                        |



|         |         |                      |   |   |                             |                                        |
|---------|---------|----------------------|---|---|-----------------------------|----------------------------------------|
| HP289CQ | pet dog | <i>E. hirae</i>      | 4 |   | AMK/ERY/MUP/TET             |                                        |
| HP290CQ | pet dog | <i>E. hirae</i>      | 2 |   | ERY/TET                     |                                        |
| HP291CQ | pet dog | <i>E. faecium</i>    | 6 | √ | GEN/AMK/AMP/ERY/NIT/CIP/TET | <i>efaAfm</i>                          |
| HP292CQ | pet dog | <i>E. hirae</i>      | 1 |   | TET                         |                                        |
| HP293CQ | pet dog | <i>E. faecalis</i>   | 5 |   | AMK/ERY/Q-D/RIF/TET         | <i>gelE-efaAfs-ace</i>                 |
| HP294CQ | pet dog | <i>E. faecalis</i>   | 5 |   | AMK/ERY/Q-D/RIF/TET         | <i>esp-asa1-efaAfs-ace</i>             |
| HP296CQ | pet dog | <i>E. faecium</i>    | 3 |   | Q-D/RIF/TET                 | <i>efaAfm</i>                          |
| HP297CQ | pet dog | <i>E. faecium</i>    | 2 |   | ERY/Q-D                     | <i>efaAfm</i>                          |
| HP300CQ | pet dog | <i>E. faecalis</i>   | 5 | √ | GEN/AMK/Q-D/MUP/RIF/TET     | <i>esp-asa1-gelE-efaAfs-ace</i>        |
| HP303CQ | pet dog | <i>E. gallinarum</i> | 6 | √ | GEN/AMK/TEC/ERY/LZD/MUP/CIP |                                        |
| HP306CQ | pet dog | <i>E. faecalis</i>   | 5 |   | AMK/ERY/Q-D/RIF/TET         | <i>esp-asa1-gelE-efaAfs-efaAfm-ace</i> |
| HP307CQ | pet dog | <i>E. hirae</i>      | 2 |   | Q-D/TET                     |                                        |

**Supplementary Table 2** Statistics of virulence spectrum type

| Pattern of virulence factor gene         | Number (%) of isolates |
|------------------------------------------|------------------------|
| <i>esp</i>                               | 2(0.43)                |
| <i>efaAfm</i>                            | 222(47.33)             |
| <i>gelE-ace</i>                          | 1(0.21)                |
| <i>efaAfs-ace</i>                        | 4(0.85)                |
| <i>efaAfs-hyl</i>                        | 1(0.21)                |
| <i>esp-efaAfm</i>                        | 1(0.21)                |
| <i>efaAfs-hyl-ace</i>                    | 1(0.21)                |
| <i>esp-efaAfs-ace</i>                    | 1(0.21)                |
| <i>asa1-efaAfs-ace</i>                   | 9(1.92)                |
| <i>gelE-efaAfs-ace</i>                   | 4(0.85)                |
| <i>esp-asa1-efaAfs-ace</i>               | 5(1.07)                |
| <i>esp-gelE-efaAfs-ace</i>               | 2(0.43)                |
| <i>gelE-efaAfs-hyl-ace</i>               | 19(4.05)               |
| <i>asa1-gelE-efaAfs-ace</i>              | 1(0.21)                |
| <i>cylA-asa1-efaAfs-ace</i>              | 2(0.43)                |
| <i>asa1-gelE-efaAfs-hyl-ace</i>          | 13(2.78)               |
| <i>cylA-esp-asa1-efaAfs-ace</i>          | 22(4.69)               |
| <i>esp-asa1-gelE-efaAfs-ace</i>          | 6(1.28)                |
| <i>esp-asa1-gelE-efaAfs-hyl-ace</i>      | 5(1.07)                |
| <i>cylA-esp-asa1-gelE-efaAfs-ace</i>     | 4(0.85)                |
| <i>asa1-gelE-efaAfs-hyl-efaAfm-ace</i>   | 1(0.21)                |
| <i>esp-asa1-gelE-efaAfs-efaAfm-ace</i>   | 6(1.28)                |
| <i>cylA-esp-asa1-gelE-efaAfs-hyl-ace</i> | 4(0.85)                |

**Supplementary Table 3** Statistics of drug resistance spectrum type

Abbreviations: AMK-Amikacin, AMP-Ampicillin, CIP-Ciprofloxacin, ERY-Erythromycin, GEN-Gentamicin, LZD-Linezolid, MUP-Mupirocin, NIT-Nitrofurantoin, Q-D-Quinupristin-dalfopristin, RIF-Rifampin, TEC-Teicoplanin, TET-Tetracyclin, VAN-Vancomycin

| Multiple antimicrobial resistance pattern (phenotypic) | No. of isolates(%) |          |         |          |
|--------------------------------------------------------|--------------------|----------|---------|----------|
|                                                        | police dog         | dog      | cat     | total    |
|                                                        |                    | 3(1.29)  | 3(3.26) | 6(1.30)  |
| LZD                                                    | 1(0.74)            |          |         | 1(0.22)  |
| NIT                                                    | 3(2.21)            | 2(0.86)  | 1(1.09) | 6(1.30)  |
| TET                                                    | 22(16.18)          | 15(6.47) | 4(4.35) | 41(8.91) |
| Q-D                                                    |                    | 2(0.86)  | 1(1.09) | 3(0.65)  |
| RIF                                                    |                    | 2(0.86)  |         | 2(0.43)  |
| ERY                                                    |                    |          | 2(2.17) | 2(0.43)  |
| AMK/TET                                                | 3(2.21)            |          |         | 3(0.65)  |
| CIP/TET                                                | 1(0.74)            | 2(0.86)  |         | 3(0.65)  |
| ERY/TET                                                | 21(15.44)          | 10(4.31) | 1(1.09) | 32(6.96) |
| NIT/TET                                                | 8(5.88)            | 7(3.02)  |         | 15(3.26) |
| Q-D/TET                                                | 1(0.74)            | 2(0.86)  |         | 3(0.65)  |
| RIF/TET                                                | 4(2.94)            | 1(0.43)  |         | 5(1.09)  |
| MUP/RIF                                                |                    | 1(0.43)  |         | 1(0.22)  |
| AMK/Q-D                                                |                    | 2(0.86)  |         | 2(0.43)  |
| NIT/RIF                                                |                    | 1(0.43)  | 1(1.09) | 2(0.43)  |
| Q-D/RIF                                                |                    | 2(0.86)  |         | 2(0.43)  |
| ERY/RIF                                                |                    | 4(1.72)  | 2(2.17) | 6(1.30)  |
| AMK/RIF                                                |                    |          | 1(1.09) | 1(0.22)  |
| Q-D/NIT                                                |                    |          | 1(1.09) | 1(0.22)  |
| ERY/NIT                                                |                    |          | 1(1.09) | 1(0.22)  |
| ERY/Q-D                                                |                    | 1(0.43)  |         | 1(0.22)  |
| AMK/ERY/TET                                            | 1(0.74)            |          |         | 1(0.22)  |
| AMK/MUP/RIF                                            | 1(0.74)            |          |         | 1(0.22)  |
| AMK/NIT/TET                                            | 1(0.74)            |          |         | 1(0.22)  |
| AMK/Q-D/RIF                                            | 3(2.21)            | 2(0.86)  | 3(3.26) | 8(1.74)  |
| AMK/Q-D/TET                                            | 2(1.47)            |          |         | 2(0.43)  |
| CIP/RIF/TET                                            | 2(1.47)            | 1(0.43)  |         | 3(0.65)  |
| ERY/NIT/TET                                            | 12(8.82)           |          |         | 12(2.61) |
| ERY/Q-D/TET                                            | 3(2.21)            | 2(0.86)  | 1(1.09) | 6(1.30)  |
| ERY/RIF/TET                                            | 1(0.74)            | 4(1.72)  |         | 5(1.09)  |
| NIT/CIP/TET                                            | 2(1.47)            | 2(0.86)  |         | 4(0.87)  |
| ERY/Q-D/RIF                                            |                    | 3(1.29)  | 1(1.09) | 4(0.87)  |
| Q-D/RIF/TET                                            |                    | 3(1.29)  |         | 3(0.65)  |
| NIT/RIF/TET                                            | 2(1.47)            | 1(0.43)  |         | 3(0.65)  |
| ERY/NIT/RIF                                            |                    | 5(2.16)  |         | 5(1.09)  |
| Q-D/NIT/TET                                            |                    | 2(0.86)  |         | 2(0.43)  |

|                     |         |         |         |         |
|---------------------|---------|---------|---------|---------|
| NIT/CIP/RIF         |         | 1(0.43) |         | 1(0.22) |
| AMK/ERY/Q-D         |         |         | 3(3.26) | 3(0.65) |
| Q-D/NIT/RIF         |         | 1(0.43) | 1(1.09) | 2(0.43) |
| MUP/RIF/TET         |         | 1(0.43) |         | 1(0.22) |
| ERY/MUP/CIP         |         | 1(0.43) |         | 1(0.22) |
| LZD/NIT/TET         |         | 2(0.86) |         | 2(0.43) |
| ERY/LZD/TET         |         | 1(0.43) |         | 1(0.22) |
| ERY/MUP/TET         |         | 1(0.43) |         | 1(0.22) |
| AMK/ERY/Q-D/TET     | 1(0.74) | 2(0.86) |         | 3(0.65) |
| AMK/Q-D/CIP/RIF     | 2(1.47) |         | 1(1.09) | 3(0.65) |
| AMK/Q-D/CIP/TET     | 1(0.74) |         |         | 1(0.22) |
| AMK/Q-D/RIF/TET     | 2(1.47) | 4(1.72) | 1(1.09) | 7(1.52) |
| AMP/ERY/Q-D/TET     | 1(0.74) |         |         | 1(0.22) |
| ERY/CIP/RIF/TET     | 1(0.74) |         |         | 1(0.22) |
| ERY/NIT/CIP/TET     | 1(0.74) |         |         | 1(0.22) |
| ERY/Q-D/NIT/TET     | 2(1.47) | 1(0.43) |         | 3(0.65) |
| NIT/CIP/RIF/TET     | 2(1.47) | 4(1.72) |         | 6(1.30) |
| TEC/LZD/MUP/NIT     | 1(0.74) |         |         | 1(0.22) |
| Q-D/NIT/RIF/TET     |         | 4(1.72) |         | 4(0.87) |
| ERY/Q-D/NIT/RIF     |         | 3(1.29) |         | 3(0.65) |
| ERY/Q-D/RIF/TET     |         | 9(3.88) |         | 9(1.96) |
| AMK/ERY/RIF/TET     |         | 1(0.43) |         | 1(0.22) |
| ERY/NIT/RIF/TET     |         | 4(1.72) |         | 4(0.87) |
| AMK/CIP/RIF/TET     |         | 1(0.43) |         | 1(0.22) |
| VAN/Q-D/NIT/TET     |         | 1(0.43) |         | 1(0.22) |
| ERY/NIT/CIP/RIF     |         |         | 1(1.09) | 1(0.22) |
| AMP/ERY/NIT/TET     |         | 1(0.43) | 2(2.17) | 3(0.65) |
| TEC/LZD/NIT/TET     |         | 1(0.43) |         | 1(0.22) |
| ERY/LZD/NIT/TET     |         | 2(0.86) |         | 2(0.43) |
| AMK/ERY/MUP/TET     |         | 1(0.43) |         | 1(0.22) |
| GEN/ERY/NIT/TET     | 1(0.74) |         |         | 1(0.22) |
| GEN/AMK/ERY/TET     |         | 2(0.86) |         | 2(0.43) |
| GEN/TEC/LZD/MUP     |         | 1(0.43) |         | 1(0.22) |
| ERY/LZD/MUP/CIP/TET | 1(0.74) |         |         | 1(0.22) |
| ERY/Q-D/NIT/CIP/TET |         | 1(0.43) |         | 1(0.22) |
| AMK/ERY/Q-D/RIF/TET |         | 9(3.88) |         | 9(1.96) |
| ERY/Q-D/LZD/CIP/TET |         | 1(0.43) |         | 1(0.22) |
| AMP/ERY/Q-D/RIF/TET |         | 1(0.43) |         | 1(0.22) |
| AMK/Q-D/CIP/RIF/TET |         | 3(1.29) | 1(1.09) | 4(0.87) |
| ERY/LZD/NIT/CIP/TET |         | 1(0.43) |         | 1(0.22) |
| AMK/ERY/Q-D/NIT/TET |         | 1(0.43) |         | 1(0.22) |
| ERY/Q-D/NIT/RIF/TET |         | 2(0.86) |         | 2(0.43) |
| ERY/NIT/CIP/RIF/TET |         | 2(0.86) |         | 2(0.43) |
| TEC/ERY/LZD/CIP/TET |         | 1(0.43) |         | 1(0.22) |

|                             |         |         |         |          |
|-----------------------------|---------|---------|---------|----------|
| ERY/Q-D/LZD/NIT/TET         |         | 1(0.43) |         | 1(0.22)  |
| AMK/Q-D/LZD/CIP/RIF         |         | 1(0.43) |         | 1(0.22)  |
| GEN/AMK/ERY/NIT/TET         | 1(0.74) |         |         | 1(0.22)  |
| GEN/AMK/Q-D/RIF/TET         | 1(0.74) |         |         | 1(0.22)  |
| GEN/ERY/Q-D/RIF/TET         |         | 1(0.43) | 1(1.09) | 2(0.43)  |
| GEN/AMK/ERY/Q-D/TET         |         | 3(1.29) | 4(4.35) | 7(1.52)  |
| GEN/AMK/ERY/Q-D/RIF         |         | 2(0.86) |         | 2(0.43)  |
| GEN/AMK/ERY/CIP/TET         |         |         | 1(1.09) | 1(0.22)  |
| GEN/AMK/AMP/RIF/TET         |         | 1(0.43) |         | 1(0.22)  |
| GEN/AMK/AMP/ERY/TET         |         | 1(0.43) |         | 1(0.22)  |
| GEN/TEC/LZD/MUP/CIP         |         | 1(0.43) |         | 1(0.22)  |
| AMP/ERY/Q-D/NIT/CIP/TET     | 1(0.74) |         |         | 1(0.22)  |
| ERY/LZD/MUP/CIP/RIF/TET     | 1(0.74) |         |         | 1(0.22)  |
| AMK/ERY/Q-D/LZD/RIF/TET     |         | 1(0.43) |         | 1(0.22)  |
| AMK/ERY/Q-D/MUP/RIF/TET     |         | 1(0.43) |         | 1(0.22)  |
| AMK/TEC/ERY/LZD/NIT/TET     |         | 1(0.43) |         | 1(0.22)  |
| TEC/ERY/Q-D/LZD/NIT/TET     |         | 1(0.43) |         | 1(0.22)  |
| AMP/ERY/Q-D/CIP/RIF/TET     |         | 1(0.43) |         | 1(0.22)  |
| ERY/Q-D/NIT/CIP/RIF/TET     |         | 1(0.43) |         | 1(0.22)  |
| AMP/ERY/NIT/CIP/RIF/TET     |         | 1(0.43) |         | 1(0.22)  |
| AMK/ERY/Q-D/NIT/RIF/TET     |         | 1(0.43) |         | 1(0.22)  |
| AMK/Q-D/LZD/MUP/CIP/RIF     |         | 1(0.43) |         | 1(0.22)  |
| GEN/AMK/AMP/ERY/NIT/TET     | 1(0.74) | 1(0.43) | 4(4.35) | 6(1.30)  |
| GEN/AMK/AMP/ERY/Q-D/TET     | 1(0.74) |         |         | 1(0.22)  |
| GEN/AMK/ERY/Q-D/RIF/TET     | 2(1.47) | 4(1.72) | 8(8.70) | 14(3.04) |
| GEN/AMK/ERY/Q-D/CIP/TET     |         | 1(0.43) | 1(1.09) | 2(0.43)  |
| GEN/AMK/AMP/ERY/NIT/CIP     |         |         | 1(1.09) | 1(0.22)  |
| GEN/AMK/AMP/ERY/CIP/TET     |         |         | 5(5.43) | 5(1.09)  |
| GEN/ERY/Q-D/NIT/RIF/TET     |         | 1(0.43) |         | 1(0.22)  |
| GEN/ERY/Q-D/CIP/RIF/TET     |         | 1(0.43) |         | 1(0.22)  |
| GEN/AMK/ERY/Q-D/LZD/TET     |         | 1(0.43) |         | 1(0.22)  |
| GEN/AMK/AMP/NIT/CIP/TET     |         | 1(0.43) |         | 1(0.22)  |
| GEN/AMK/Q-D/LZD/MUP/CIP     |         | 1(0.43) |         | 1(0.22)  |
| GEN/AMK/Q-D/MUP/RIF/TET     |         | 1(0.43) |         | 1(0.22)  |
| AMK/ERY/Q-D/LZD/CIP/RIF/TET | 1(0.74) |         |         | 1(0.22)  |
| AMP/ERY/Q-D/NIT/CIP/RIF/TET |         | 1(0.43) |         | 1(0.22)  |
| AMK/ERY/Q-D/NIT/CIP/RIF/TET |         | 1(0.43) |         | 1(0.22)  |
| AMK/ERY/Q-D/LZD/NIT/RIF/TET |         | 1(0.43) |         | 1(0.22)  |
| AMK/TEC/VAN/Q-D/LZD/RIF/TET |         | 1(0.43) |         | 1(0.22)  |
| AMK/AMP/ERY/Q-D/CIP/RIF/TET |         | 1(0.43) |         | 1(0.22)  |
| GEN/AMK/AMP/ERY/CIP/RIF/TET | 3(2.21) | 2(0.86) | 1(1.09) | 6(1.30)  |
| GEN/AMK/ERY/Q-D/CIP/RIF/TET | 2(1.47) | 5(2.16) | 7(7.61) | 14(3.04) |
| GEN/AMK/Q-D/MUP/CIP/RIF/TET |         | 1(0.43) |         | 1(0.22)  |
| GEN/AMK/ERY/Q-D/MUP/RIF/TET |         |         | 1(1.09) | 1(0.22)  |

|                                             |         |         |         |          |
|---------------------------------------------|---------|---------|---------|----------|
| GEN/AMK/ERY/Q-D/NIT/CIP/TET                 |         | 1(0.43) | 1(1.09) | 2(0.43)  |
| GEN/AMK/AMP/ERY/Q-D/CIP/TET                 |         |         | 1(1.09) | 1(0.22)  |
| GEN/AMK/ERY/NIT/CIP/RIF/TET                 |         |         | 1(1.09) | 1(0.22)  |
| GEN/AMK/AMP/ERY/NIT/CIP/TET                 |         | 1(0.43) | 2(2.17) | 3(0.65)  |
| GEN/AMK/ERY/Q-D/LZD/CIP/TET                 |         |         | 1(1.09) | 1(0.22)  |
| GEN/AMK/TEC/LZD/MUP/CIP/TET                 |         |         | 1(1.09) | 1(0.22)  |
| GEN/ERY/Q-D/LZD/MUP/CIP/TET                 |         |         | 1(1.09) | 1(0.22)  |
| GEN/ERY/Q-D/NIT/CIP/RIF/TET                 |         | 1(0.43) |         | 1(0.22)  |
| GEN/AMK/ERY/Q-D/LZD/RIF/TET                 |         | 1(0.43) |         | 1(0.22)  |
| GEN/AMK/Q-D/LZD/MUP/CIP/RIF                 |         | 1(0.43) |         | 1(0.22)  |
| GEN/AMK/AMP/ERY/Q-D/NIT/TET                 |         | 1(0.43) |         | 1(0.22)  |
| GEN/AMK/TEC/ERY/LZD/MUP/CIP                 |         |         |         | 0(0.00)  |
| AMK/AMP/ERY/Q-D/NIT/CIP/RIF/TET             |         | 2(0.86) |         | 2(0.43)  |
| AMK/AMP/ERY/Q-D/LZD/NIT/RIF/TET             |         | 1(0.43) |         | 1(0.22)  |
| TEC/ERY/Q-D/LZD/MUP/CIP/RIF/TET             |         | 1(0.43) |         | 1(0.22)  |
| GEN/AMK/AMP/ERY/Q-D/CIP/RIF/TET             | 2(1.47) | 1(0.43) |         | 3(0.65)  |
| GEN/AMK/ERY/Q-D/LZD/CIP/RIF/TET             | 1(0.74) | 5(2.16) | 1(1.09) | 7(1.52)  |
| GEN/AMK/ERY/Q-D/LZD/MUP/CIP/RIF             | 1(0.74) |         | 1(1.09) | 2(0.43)  |
| GEN/AMK/ERY/Q-D/LZD/NIT/CIP/TET             | 1(0.74) |         |         | 1(0.22)  |
| GEN/AMK/AMP/ERY/Q-D/NIT/CIP/TET             |         | 2(0.86) | 1(1.09) | 3(0.65)  |
| GEN/AMK/AMP/ERY/LZD/NIT/CIP/TET             |         | 1(0.43) | 1(1.09) | 2(0.43)  |
| GEN/AMK/ERY/Q-D/MUP/CIP/RIF/TET             |         |         | 2(2.17) | 2(0.43)  |
| GEN/AMK/AMP/ERY/NIT/CIP/RIF/TET             |         |         | 9(9.78) | 9(1.96)  |
| GEN/AMK/ERY/Q-D/LZD/MUP/CIP/TET             |         |         | 1(1.09) | 1(0.22)  |
| GEN/AMK/Q-D/LZD/MUP/CIP/RIF/TET             |         | 1(0.43) |         | 1(0.22)  |
| GEN/AMK/ERY/Q-D/LZD/MUP/NIT/TET             |         | 1(0.43) |         | 1(0.22)  |
| AMK/TEC/ERY/Q-D/LZD/MUP/NIT/CIP/TET         |         | 1(0.43) |         | 1(0.22)  |
| GEN/AMK/AMP/ERY/Q-D/NIT/CIP/RIF/TET         | 4(2.94) | 5(2.16) | 1(1.09) | 10(2.17) |
| GEN/AMK/ERY/Q-D/LZD/MUP/CIP/RIF/TET         | 1(0.74) | 3(1.29) |         | 4(0.87)  |
| GEN/AMK/TEC/ERY/Q-D/LZD/MUP/CIP/TET         |         | 2(0.86) |         | 2(0.43)  |
| GEN/AMK/AMP/ERY/Q-D/LZD/NIT/CIP/RIF/TET     | 2(1.47) |         |         | 2(0.43)  |
| GEN/AMK/TEC/ERY/Q-D/LZD/MUP/NIT/CIP/RIF/TET |         | 1(0.43) |         | 1(0.22)  |

---
